# Supplementary material for: Quantifying murine placental extracellular vesicles across gestation and in preterm birth data with tidyNano: A computational framework for analyzing and visualizing nanoparticle data in R
Source: PubMed Central journal article supplement (PMC6581270; doi:10.1371/journal.pone.0218270), 2019-06-18
Supplement: pone.0218270.s008.pdf [file pone.0218270.s008.pdf]

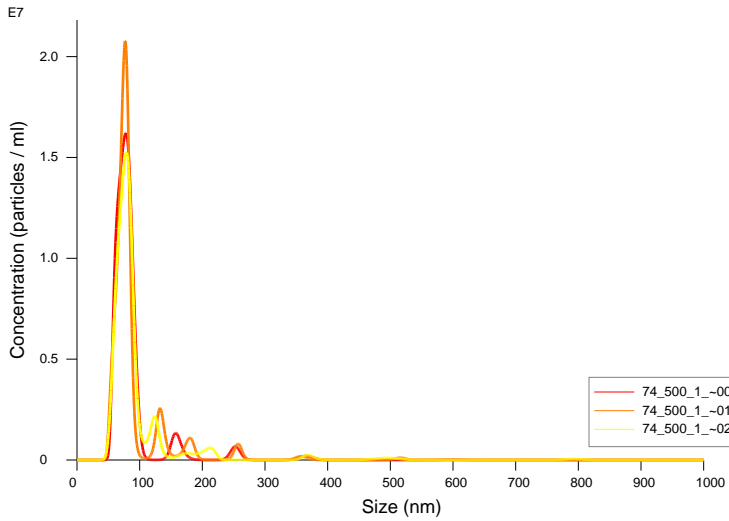

FTLA Concentration / Size graph for Experiment:  
74\_500\_1\_

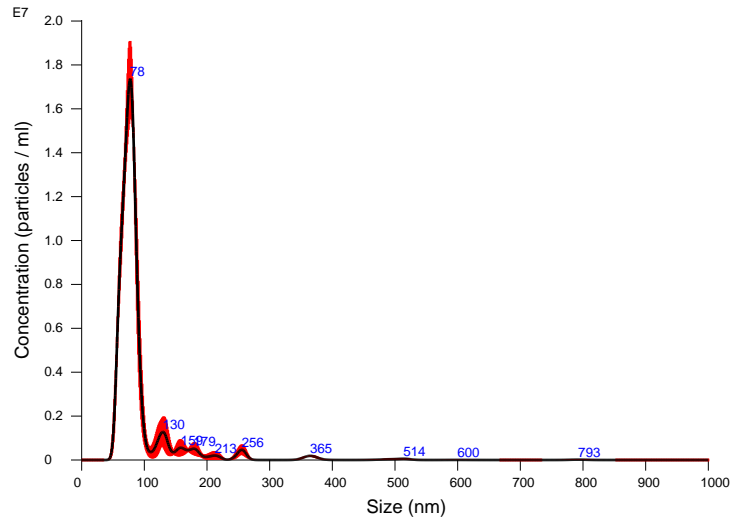

Averaged FTLA Concentration / Size for Experiment:  
74\_500\_1\_  
Error bars indicate + / - 1 standard error of the mean

**Included Files**

74\_500\_1\_00  
74\_500\_1\_01  
74\_500\_1\_02

**Details**

NTA Version: NTA 3.2 Dev Build 3.2.16  
Script Used: SOP Standard Measurement 11-35-16AM 21Mar2017.txt  
Time Captured: 13:11:36 21/03/2017  
Operator: SN  
Pre-treatment:  
Sample Name: SJ\_74 1:500 in PBS no filter  
Diluent: PBS  
Remarks: installation with 488 laser SJ\_74 1:500 in PBS no filter

**Capture Settings**

Camera Type: sCMOS  
Laser Type: Blue488  
Camera Level: 12  
Slider Shutter: 1200  
Slider Gain: 146  
FPS: 25.0  
Number of Frames: 749  
Temperature: 22.7 °C  
Viscosity: (Water) 0.938 - 0.938 cP  
Dilution factor: Dilution not recorded  
Syringe Pump Speed: 50

**Analysis Settings**

Detect Threshold: 4  
Blur Size: Auto  
Max Jump Distance: Auto: 15.3 - 16.1 pix

**Results**

Stats: Merged Data

Mean: 91.1 nm  
Mode: 77.4 nm  
SD: 57.0 nm  
D10: 60.2 nm  
D50: 76.5 nm  
D90: 129.3 nm

Stats: Mean +/- Standard Error

Mean: 91.1 +/- 2.0 nm  
Mode: 77.9 +/- 0.6 nm  
SD: 56.3 +/- 6.7 nm  
D10: 60.2 +/- 0.2 nm  
D50: 76.6 +/- 0.7 nm  
D90: 119.9 +/- 11.2 nm  
Concentration (Upgrade): 5.56e+008 +/- 3.87e+006 particles/ml  
68.7 +/- 0.6 particles/frame  
68.7 +/- 0.4 centres/frame

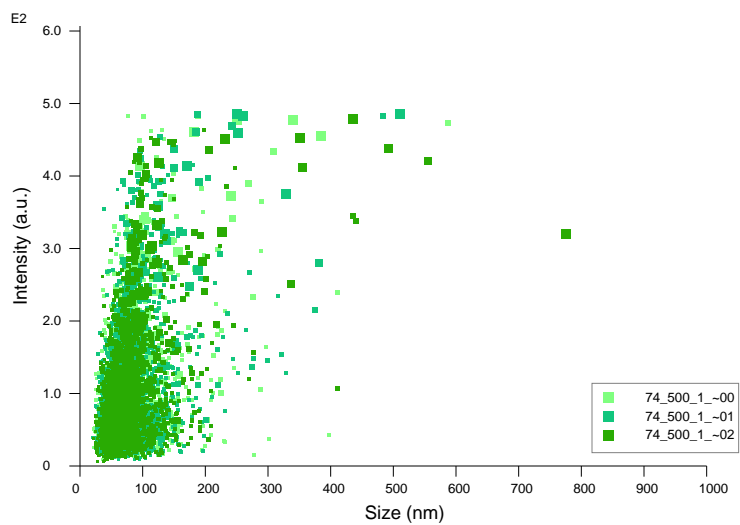

Intensity / Size graph for Experiment:  
74\_500\_1\_
